# Supplementary material for: Morphological analysis of mercury in solid wastes from natural gas processing plants: optimization of a temperature-programmed decomposition and desorption method
Source: Royal Society of Chemistry journal article supplement (doi:10.1039/d4ay01348d), 2024-01-01
Supplement: d4ay01348d1.pdf [file d4ay01348d1.pdf]

**Morphological analysis of mercury in solid wastes from natural gas processing plants: Optimization of temperature-programmed decomposition and desorption method**

Shengji Wu<sup>a</sup>, Guiyuan Hu<sup>a</sup>, Yutao Shen<sup>b</sup>, Rui Tang<sup>c</sup>, Fan Yang<sup>a</sup>, Lei Che<sup>a,c</sup>, Wei Yang<sup>a,\*</sup>

<sup>a</sup>College of Engineering, Huzhou University, No. 759, East 2nd Road, Huzhou, 313000 China

<sup>b</sup>Huzhou Weineng Environmental Service Co., LTD. Huzhou, 313000 China

<sup>c</sup>Zhejiang ECO Environmental Technology Co., LTD. No. 1188, Wuxing District, Huzhou, 313000 China

\*Corresponding author: wei\_yang15@hotmail.com

Table S1. Designation of pure mercury compound samples

| Sample                          | Concentration                       |                                     |                                                     |                                                                   |
|---------------------------------|-------------------------------------|-------------------------------------|-----------------------------------------------------|-------------------------------------------------------------------|
|                                 | 0.1%                                | 0.5%                                | 1%                                                  | 1%                                                                |
| HgS(Red)                        | 0.1%HgS<br>(Red)/SiO <sub>2</sub>   | 0.5%HgS<br>(Red)/SiO <sub>2</sub>   | 1%HgS (Red)/SiO <sub>2</sub>                        | 1%HgS(Red)/<br>Al <sub>2</sub> O <sub>3</sub>                     |
| HgS(Black)                      | 0.1%HgS<br>(Black)/SiO <sub>2</sub> | 0.5%HgS<br>(Black)/SiO <sub>2</sub> | 1%HgS<br>(Black)/SiO <sub>2</sub>                   | 0.1% HgS<br>(Black)/Al <sub>2</sub> O <sub>3</sub>                |
| HgO(Red)                        | /                                   | /                                   | 1%HgO(Red)/SiO <sub>2</sub>                         | /                                                                 |
| Hg <sub>2</sub> Cl <sub>2</sub> | /                                   | /                                   | 1%Hg <sub>2</sub> Cl <sub>2</sub> /SiO <sub>2</sub> | 1%Hg <sub>2</sub> Cl <sub>2</sub> /Al <sub>2</sub> O <sub>3</sub> |
| HgCl <sub>2</sub>               | /                                   | /                                   | /                                                   | 1%HgCl <sub>2</sub> /Al <sub>2</sub> O <sub>3</sub>               |
| HgSO <sub>4</sub>               | /                                   | /                                   | 1%HgSO <sub>4</sub> /SiO <sub>2</sub>               | 1%HgSO <sub>4</sub> /Al <sub>2</sub> O <sub>3</sub>               |

/: Sample not prepared

Table S2. Mercury desorption temperatures of pure mercury compounds

| Mercury species                                     | Peak temperature (°C) | Temperature range (°C) | Carrier gas (L/min)  | Diluent          | Ref.       |
|-----------------------------------------------------|-----------------------|------------------------|----------------------|------------------|------------|
| HgCl <sub>2</sub>                                   | 120±10                | 70-220                 |                      |                  |            |
| Hg <sub>2</sub> Cl <sub>2</sub>                     | 80±5; 130±10          | 60-220                 |                      |                  |            |
| HgS(Black)                                          | 205±5; 245±5          | 170-290                |                      |                  |            |
| HgS(Red)                                            | 310±10                | 240-350                | N <sub>2</sub> (0.5) | SiO <sub>2</sub> | [1]        |
| HgO                                                 | 505±5                 | 430-560                |                      |                  |            |
| HgSO <sub>4</sub>                                   | 540±2                 | 500-600                |                      |                  |            |
| Hg <sub>2</sub> SO <sub>4</sub>                     | 280±10                | 120-480                |                      |                  |            |
| HgCl <sub>2</sub>                                   | 105±10                | 50-280                 |                      |                  |            |
|                                                     | 170±10*               | 100-250*               |                      |                  |            |
| Hg <sub>2</sub> Cl <sub>2</sub>                     | 110±10                | 100-250                |                      |                  |            |
| HgS(Black)                                          | 260±10                | 60-400                 |                      |                  |            |
| HgS(Red)                                            | 310±10                | 180-350                | He (0.5)             | SiO <sub>2</sub> | [2]        |
| HgO(Yellow)                                         | 260±10                | 250-400                |                      |                  |            |
| HgSO <sub>4</sub>                                   | 405±10                | 200-620                |                      |                  |            |
|                                                     | 580±10                |                        |                      |                  |            |
| HgCl <sub>2</sub>                                   | 138±4                 | 90-350                 |                      |                  |            |
| Hg <sub>2</sub> Cl <sub>2</sub>                     | 119±13                | 60-250                 |                      |                  |            |
| HgS(Black)                                          | 190±11                | 150-280                |                      |                  |            |
| HgS(Red)                                            | 305±12                | 210-340                |                      |                  |            |
| HgO(Red)                                            | 308±1; 471±5          | 200-360; 37-530        | Air (1.0)            | Pure             | [3,4]      |
| HgO(Yellow)                                         | 284±7; 469±6          | 190-380; 320-540       |                      |                  |            |
| Hg(NO <sub>3</sub> ) <sub>2</sub> ·H <sub>2</sub> O | 215 ± 4; 280 ± 13     | 150-370; 375-520       |                      |                  |            |
| HgSO <sub>4</sub>                                   | 460 ± 25              | 400-600                |                      |                  |            |
|                                                     | 583 ± 8               |                        |                      |                  |            |
| HgCl <sub>2</sub>                                   | 90±10*                | 60-400                 |                      |                  |            |
| Hg <sub>2</sub> Cl <sub>2</sub>                     | 120±5                 | 65-240                 |                      |                  |            |
| HgS(Black)                                          | 230±10                | 180-340                |                      |                  |            |
| HgS(Red)                                            | 308±10                | 201-420                | N <sub>2</sub> (0.5) | SiO <sub>2</sub> | This study |
|                                                     | 460±10                |                        |                      |                  |            |
| HgO(Red)                                            | 330±10                | 195-515                |                      |                  |            |
| HgSO <sub>4</sub>                                   | 590±10                | 480-600                |                      |                  |            |

\*: Diluted by Al<sub>2</sub>O<sub>3</sub>

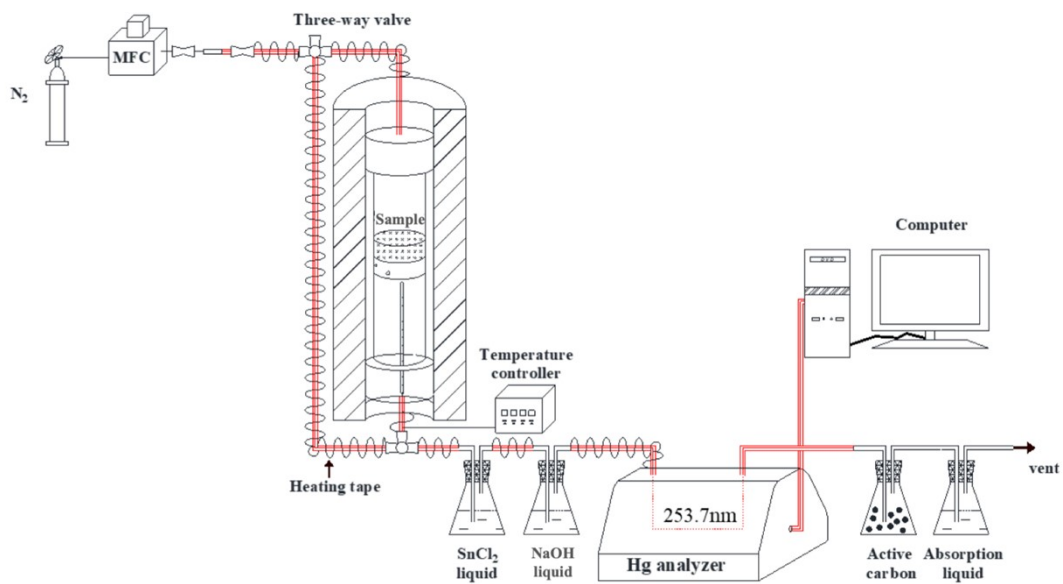

Figure S1. Schematic diagram of the fixed-bed reactor for the TPDD experiment

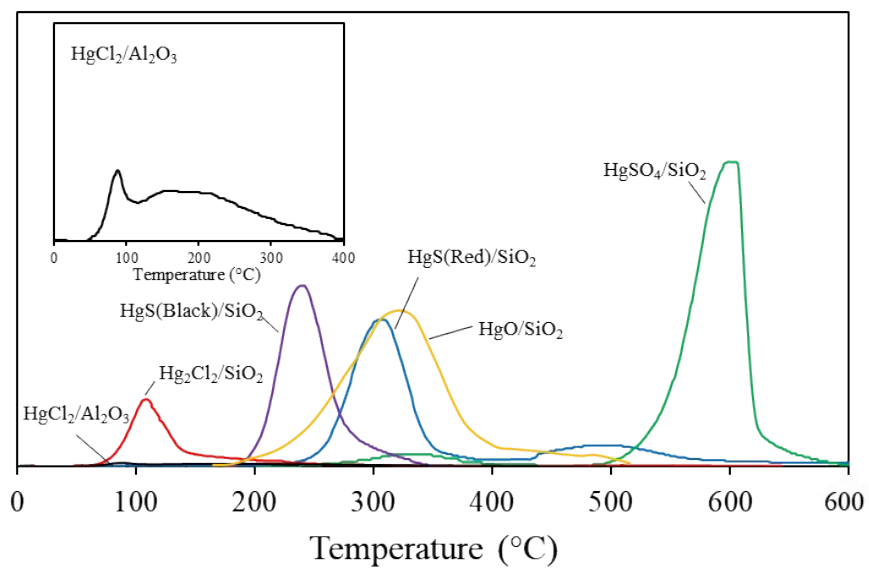

Figure S2. TPDD curves of HgS(Black), HgS(Red), HgCl<sub>2</sub>, Hg<sub>2</sub>Cl<sub>2</sub>, HgO(Red) and HgSO<sub>4</sub> supported over SiO<sub>2</sub> or Al<sub>2</sub>O<sub>3</sub>

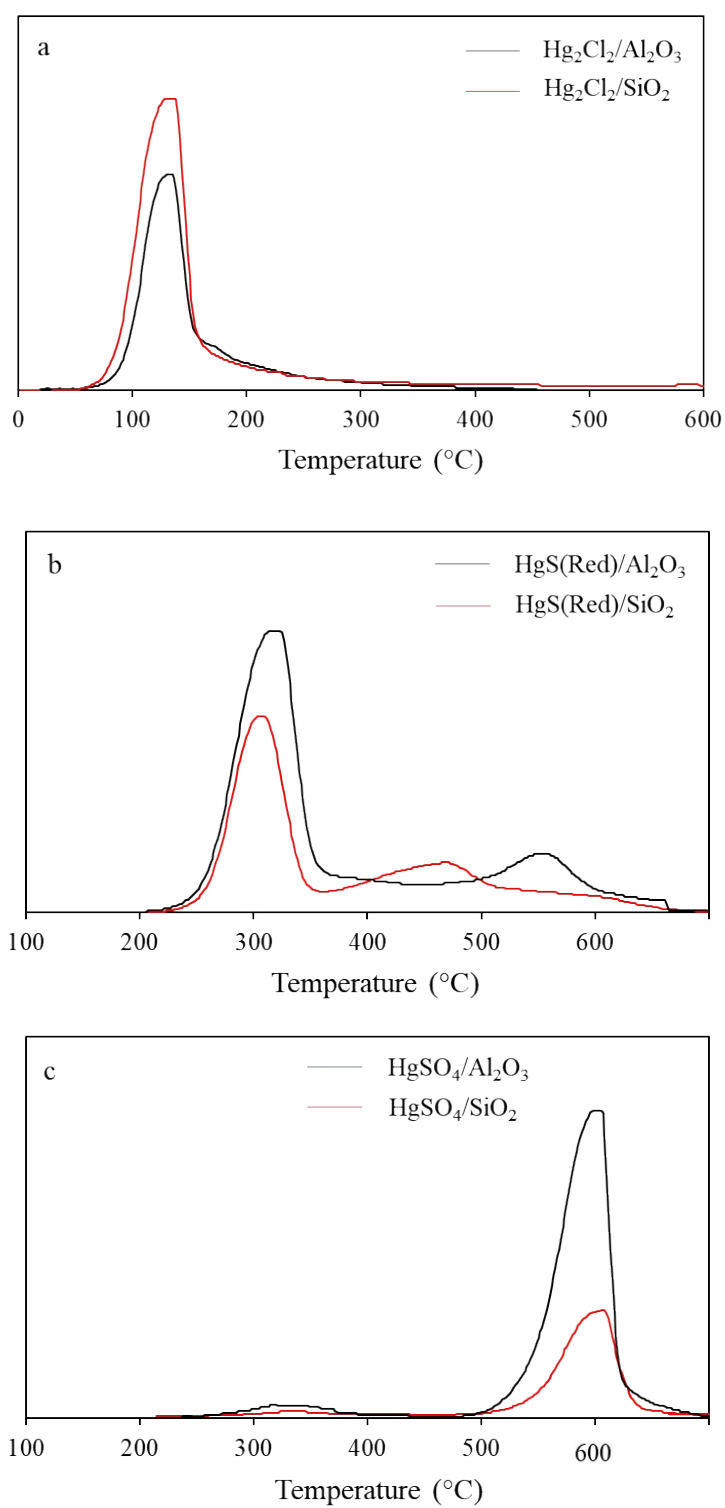

Figure S3. Effect of supporter on the desorption temperatures of (a)  $\text{Hg}_2\text{Cl}_2$ , (b)  $\text{HgS}(\text{Red})$  and (c)  $\text{HgSO}_4$

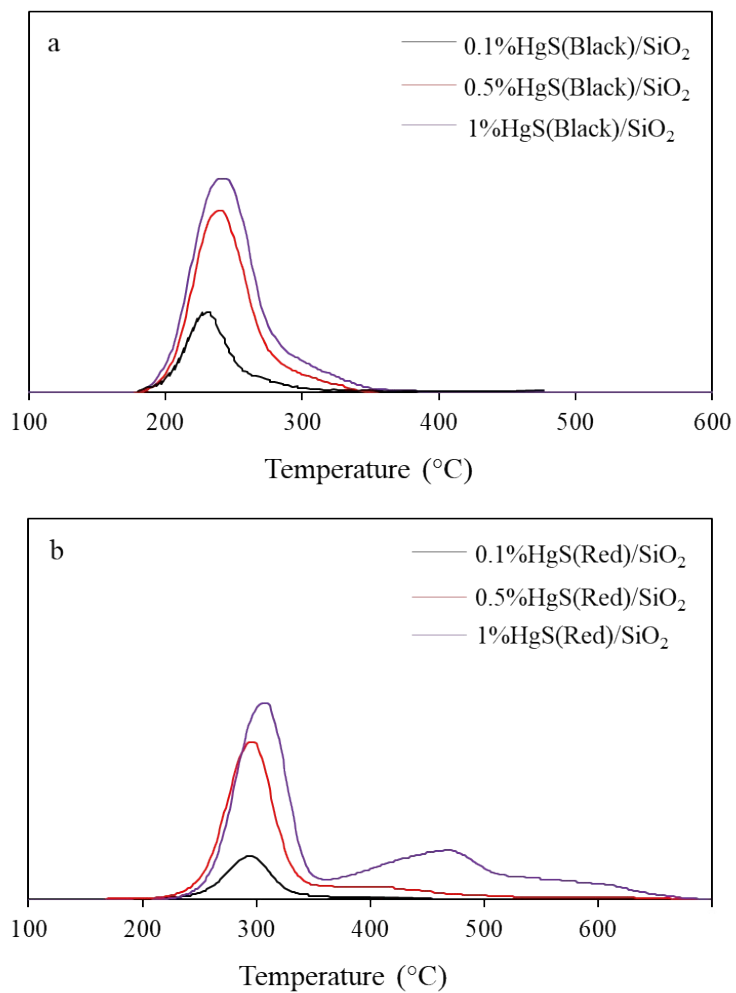

Figure S4. Effect of (a) HgS(Black) and (b) HgS(Red) concentrations on mercury desorption peak

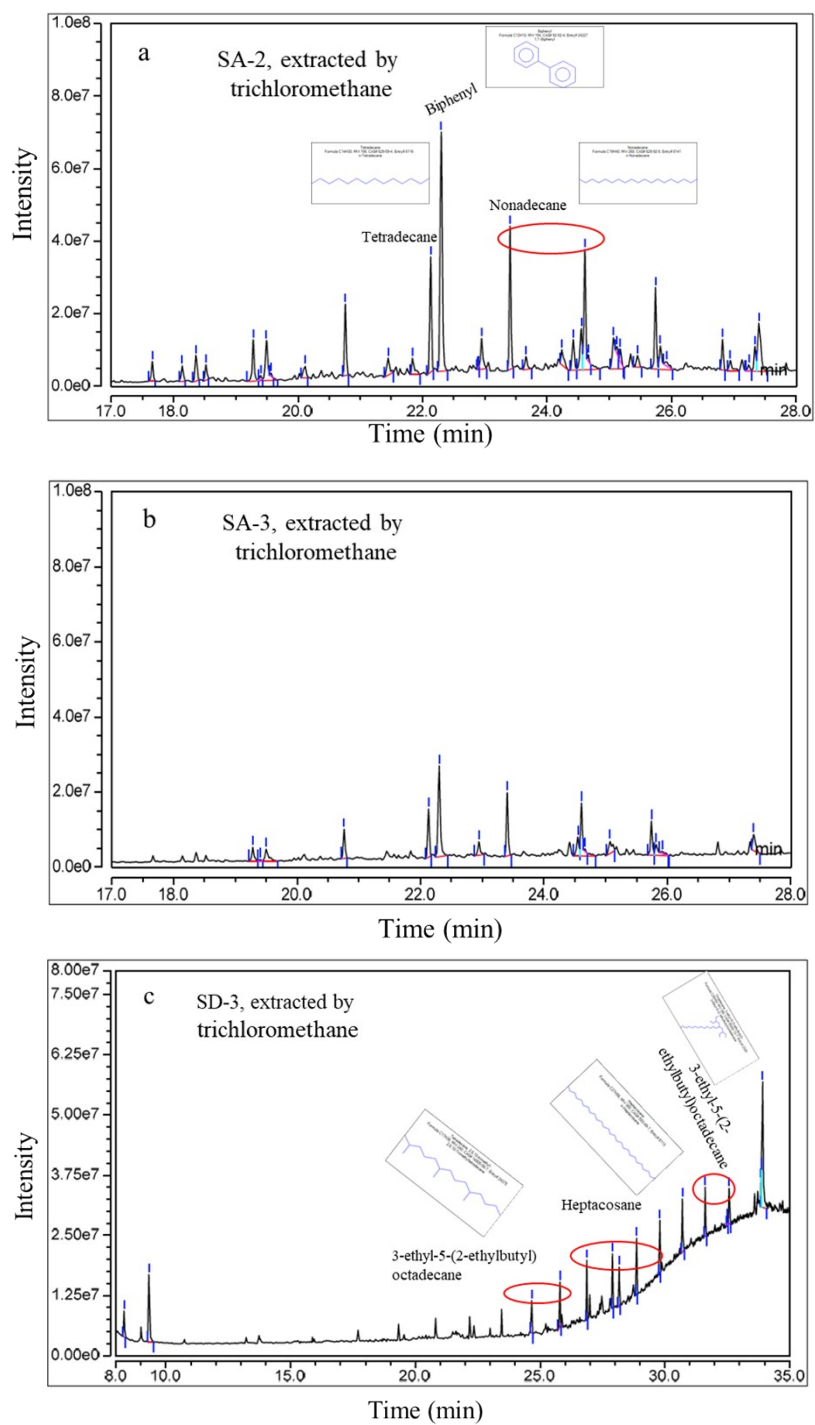

Figure S5. Oil components over (a) SA-2, (b) SA-3 and (c) SD-3



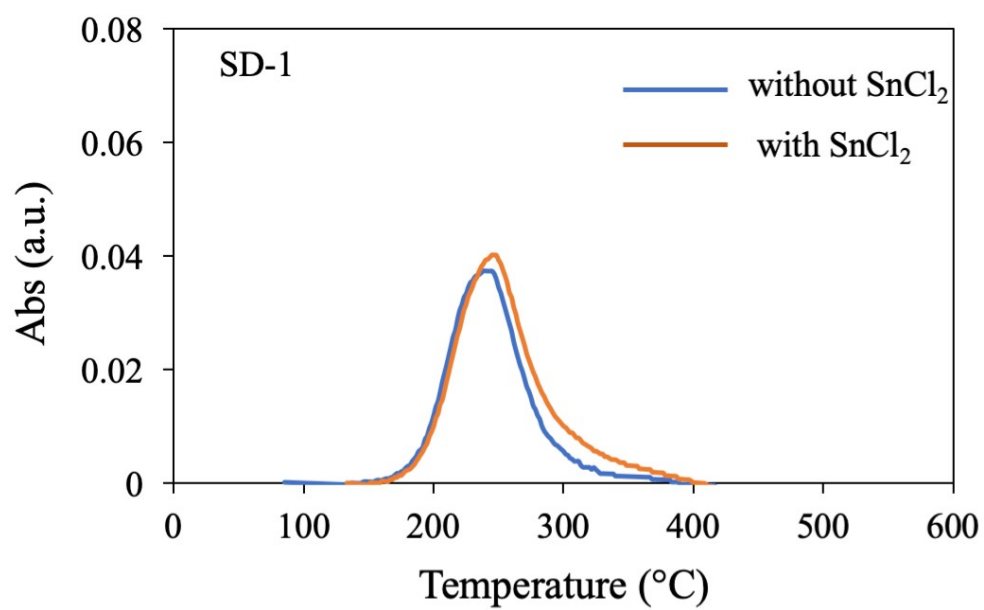

Figure S6. TPDD curves of SD-1 with and without passing through the SnCl<sub>2</sub> solution

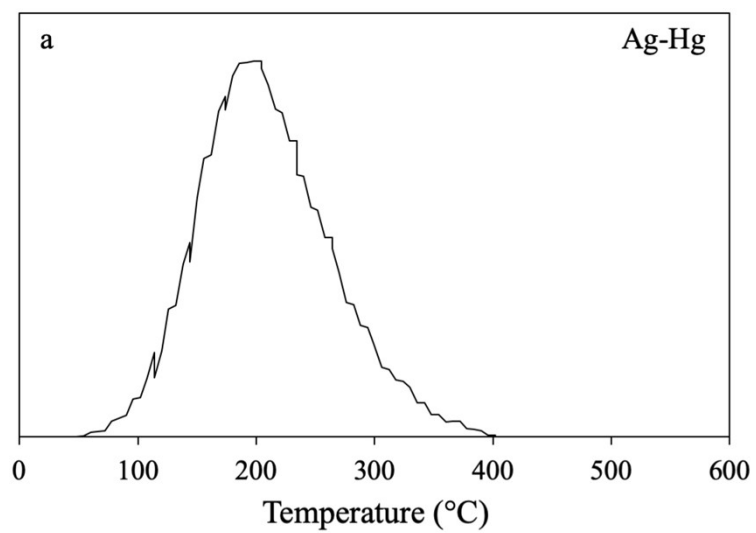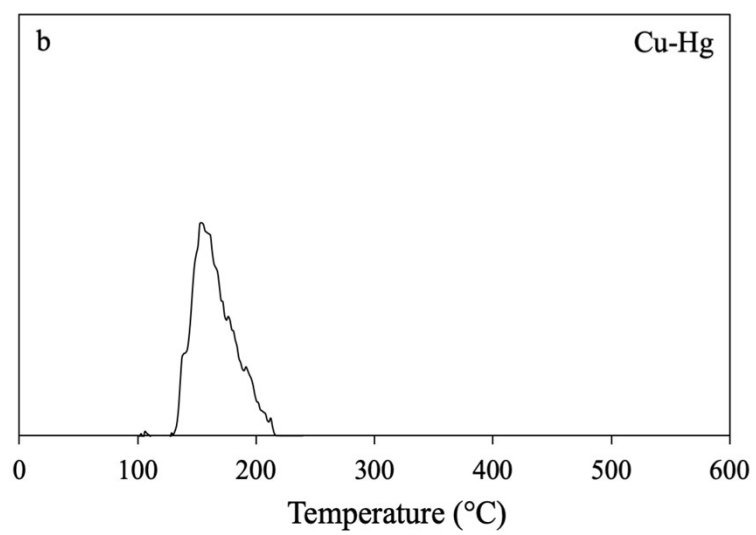

Figure S7. TPDD desorption curves of (a) Ag-Hg and (b) Cu-Hg amalgam

## References

1. Lopez-Anton MA, Yuan Y, Perry R, Maroto-Valer MM. Analysis of mercury species present during coal combustion by thermal desorption. *Fuel* 2010;89:629-34.
2. Wu SJ, Uddin MdA, Nagano S, Ozaki M, Sasaoka E. Fundamental study on decomposition characteristics of mercury compounds over solid powder by temperature-programmed decomposition desorption mass spectrometry. *Energy Fuels* 2011;25:144-53.
3. Lopez-Anton MA, Yuan Y, Perry R, Maroto-Valer MM. Analysis of mercury species present during coal combustion by thermal desorption. *Fuel* 2010;89:629-34.
4. Rumayor M, Diaz-Somoano M, Lopez-Anton MA, Martinez-Tarazona MR. Mercury compounds characterization by thermal desorption. *Talanta* 2013;114:318-22.
